# Supplementary material for: New Water-Soluble Poly(propylene imine) Dendrimer Modified with 4-Sulfo-1,8-naphthalimide Units: Sensing Properties and Logic Gates Mimicking
Source: Sensors (Basel). 2023 Jun 1;23(11):5268. doi: 10.3390/s23115268 (PMC10256094; doi:10.3390/s23115268)
Supplement: Supplementary file 1 [file sensors-23-05268-s001.zip › sensors-2398540-supplementary.pdf]

Supporting Information

# New Water Soluble Poly(propylene imine) Dendrimer modified with 4-sulfo-1,8-naphthalimide units: Sensing properties and Logic Gates Mimicking

Awad I. Said<sup>1,2\*</sup>, Desislava Staneva<sup>3</sup>, Ivo Grabchev<sup>1\*</sup>

<sup>1</sup> Sofia University “St. Kliment Ohridski”, Faculty of Medicine, 1407 Sofia, Bulgaria; i.grabchev@chem.uni-sofia.bg (I.G.)

<sup>2</sup> Assiut University, Faculty of Science, Department of Chemistry 71516 Assiut, Egypt; awadsaid@aun.edu.eg

<sup>3</sup> University of Chemical Technology and Metallurgy, Department of Textile, Leather, and Fuels, 1756 Sofia, Bulgaria; grabcheva@mail.bg

\* Correspondence: ; awadsaid@aun.edu.eg (A.S.) i.grabchev@chem.uni-sofia.bg (I.G.),

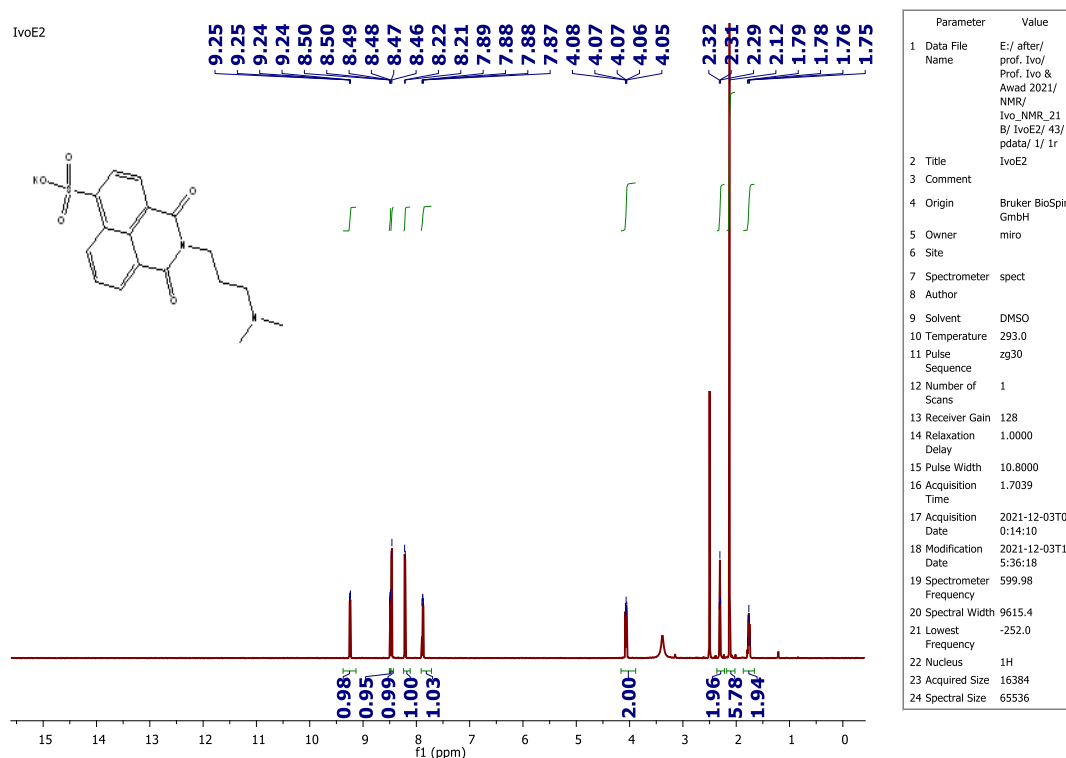

Figure S1. <sup>1</sup>H-NMR of the monomer SNIM.

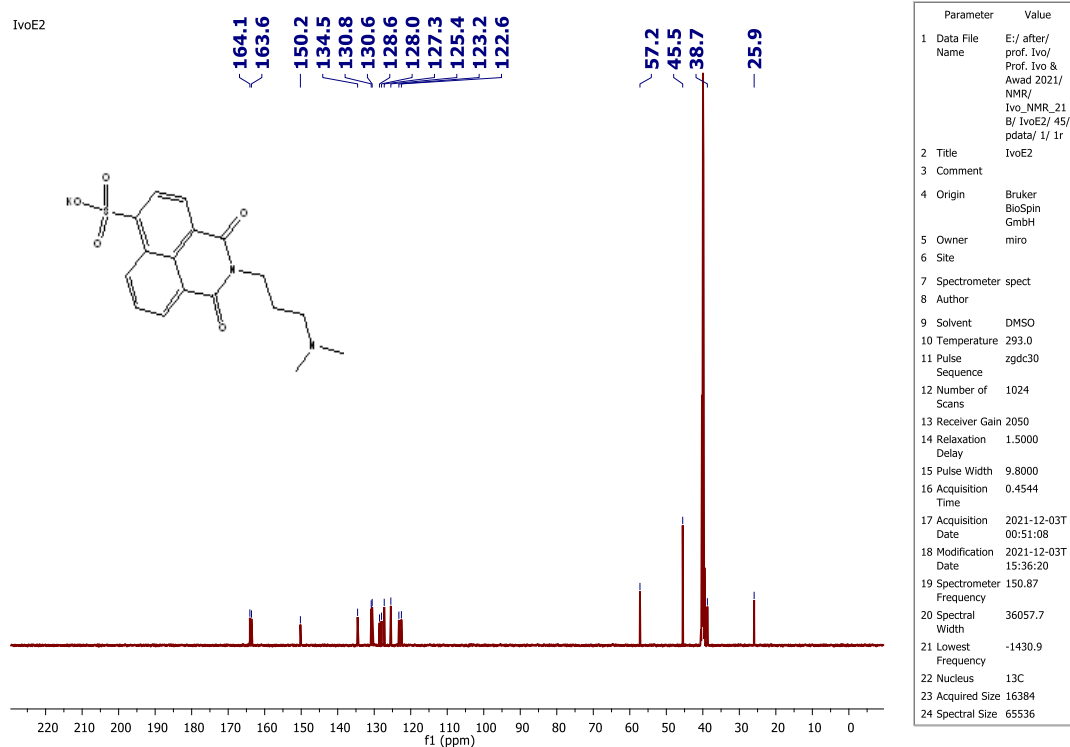

Figure S2. <sup>13</sup>C-NMR of the monomer SNIM.

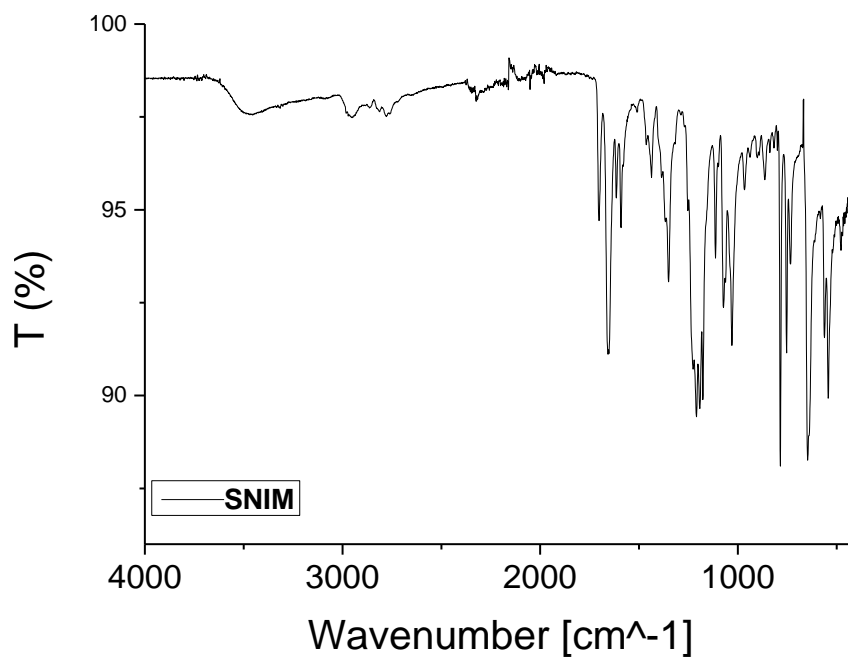

Figure S3. FTIR spectrum of the monomer SNIM.

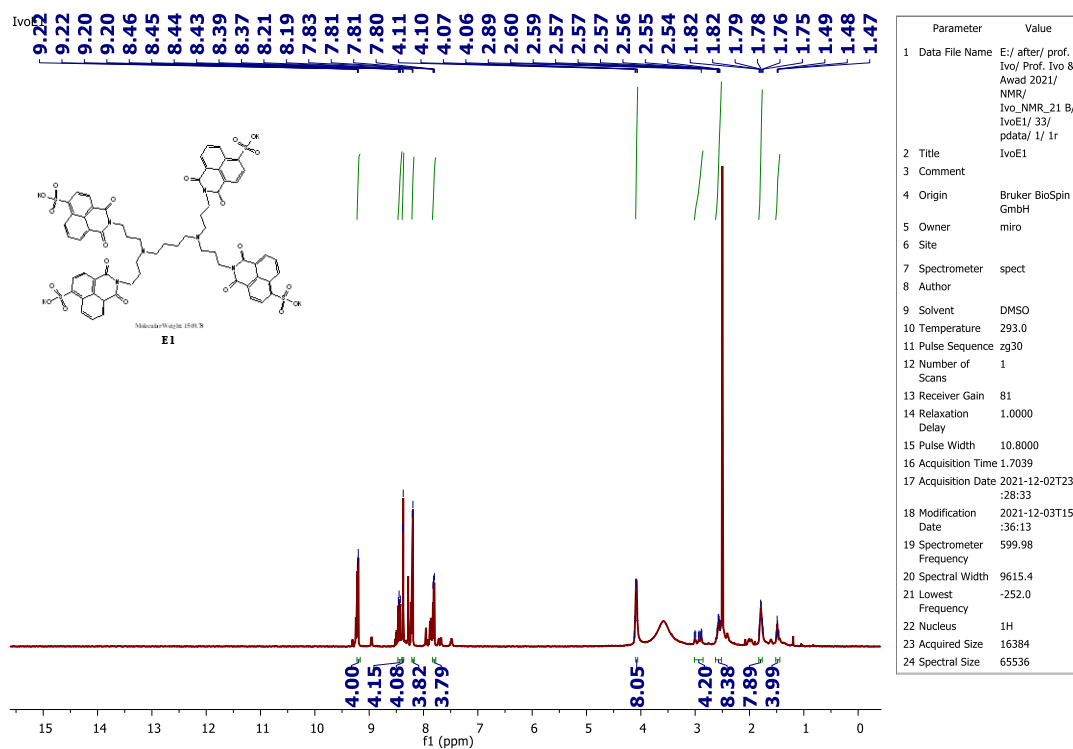

Figure S4.  $^1\text{H}$ -NMR spectrum of the dendrimer SNID.

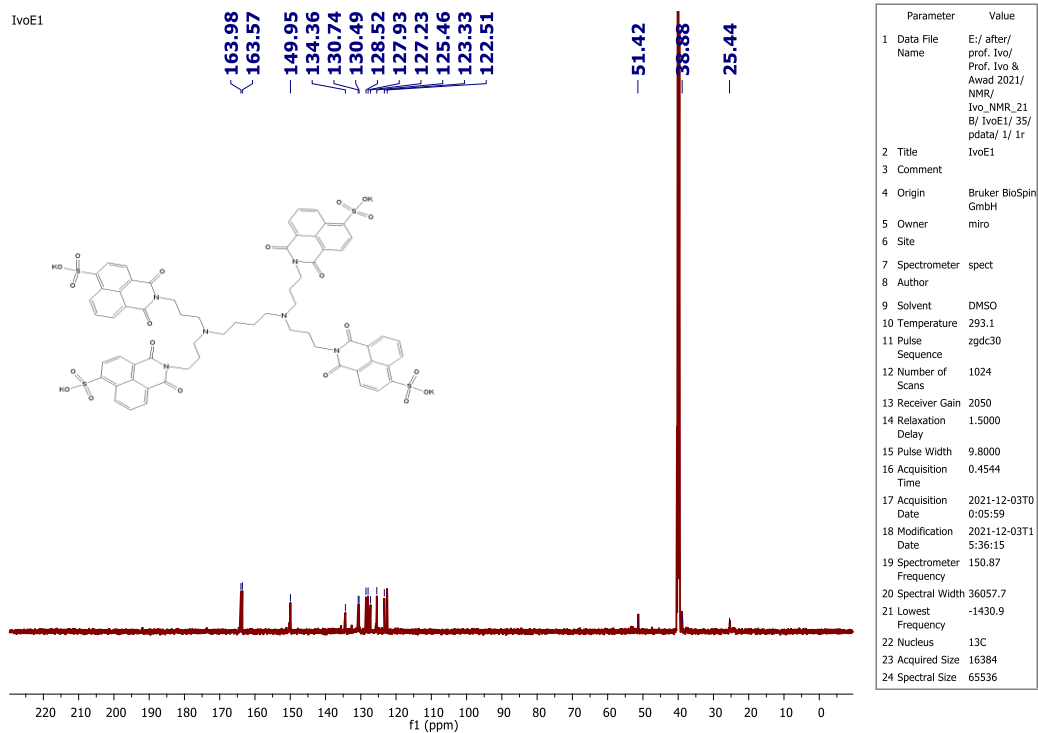

Figure S5.  $^{13}\text{C}$ -NMR spectrum of the dendrimer SNID.

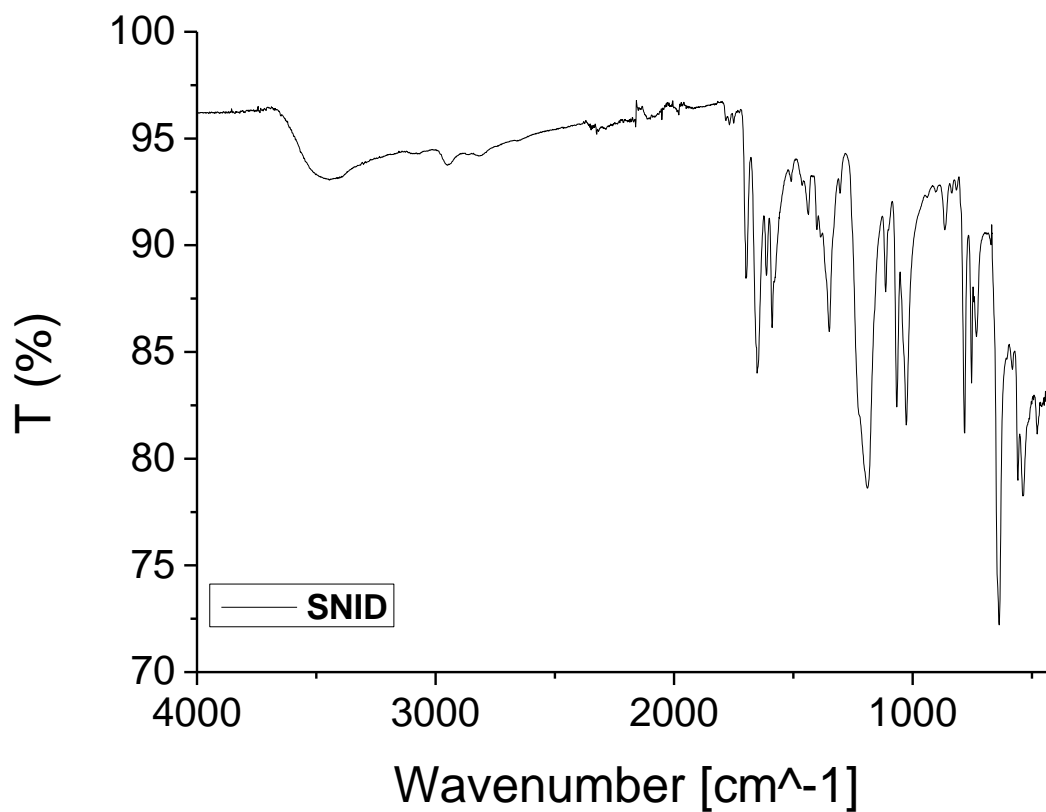

Figure S6. FTIR spectrum of the dendrimer SNID.

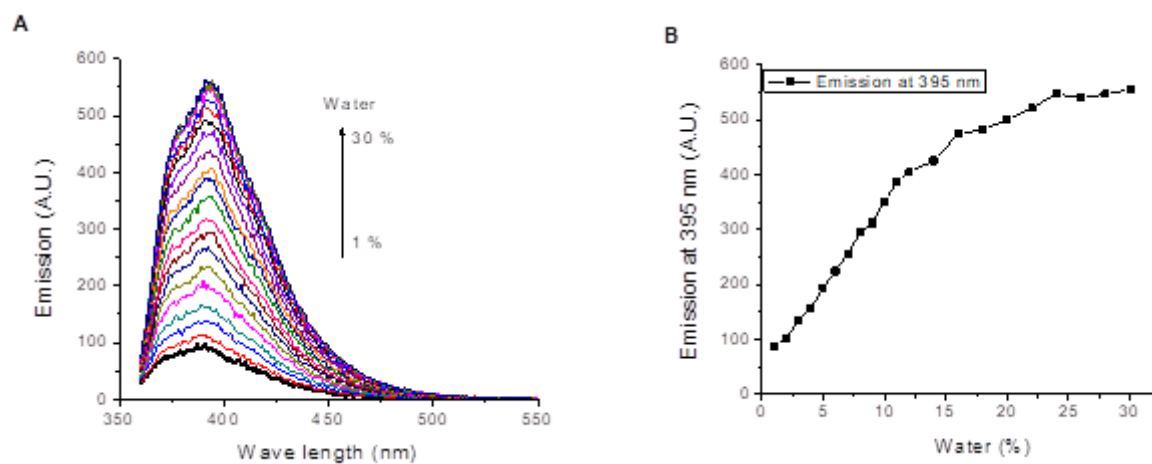

Figure S7. Influence of water on (A) emission spectrum and (B) emission at 395 nm of SNIM solution in ethanol,  $c = 10^{-5}$  M, excitation at 340 nm.
